# Supplementary material for: Impacts of Long-Term Exposure to Ocean Acidification and Warming on Three-Spined Stickleback (Gasterosteus aculeatus) Growth and Reproduction
Source: MDPI journal article supplement (doi:10.3390/fishes8100523), 2023-10-21
Supplement: s1 [file s1]

Supplementary Table S1. Pairwise Games Howell post-hoc test on stickleback growth in mass between Current and RCP8.5 condition through the 7 months of acclimation. Statistics: statistic test (t-value) used to compute the p-value; p.adj: adjusted p-value using Tukey's method, df: degrees of freedom calculated using Welch's correction. Asterisks indicate statistical difference between scenarios.

| <i>Date</i>                               | <i>t-value</i> | <i>df</i> | <i>p.adj</i> |
|-------------------------------------------|----------------|-----------|--------------|
| <i>Current November / RCP8.5 November</i> | 0              | 1         | 1.00         |
| <i>Current January / RCP8.5 January</i>   | 0.556          | 19.1      | 1.00         |
| <i>Current March / RCP8.5 March</i>       | 1.32           | 20.8      | 0.97         |
| <i>Current May / RCP8.5 May</i>           | 1.84           | 14.6      | 0.77         |
| <i>Current July / RCP8.5 July</i>         | 0.248          | 138.1     | 1.00         |
| <i>Current November / Current January</i> | 4.60           | 13.2      | 0.01*        |
| <i>Current November / RCP8.5 January</i>  | 5.68           | 16.3      | <0.01*       |
| <i>RCP8.5 November / Current January</i>  | 4.60           | 13.2      | 0.01*        |
| <i>RCP8.5 November / RCP8.5 January</i>   | 5.68           | 16.3      | <0.01*       |
| <i>Current January / Current March</i>    | 2.89           | 21.8      | 0.21         |
| <i>Current January / RCP8.5 March</i>     | 4.08           | 20.2      | 0.02*        |
| <i>RCP8.5 January / Current March</i>     | 4.41           | 19.8      | 0.01*        |
| <i>RCP8.5 January / RCP8.5 March</i>      | 6.27           | 21.9      | <0.01*       |
| <i>Current March / Current May</i>        | 2.21           | 15.9      | 0.57         |
| <i>Current March / RCP8.5 May</i>         | 3.11           | 21.4      | 0.14         |
| <i>RCP8.5 March / Current May</i>         | 0.836          | 18.4      | 0.99         |
| <i>RCP8.5 March / RCP8.5 May</i>          | 2.21           | 19.1      | 0.56         |
| <i>Current May / Current July</i>         | 8.21           | 69.7      | <0.01*       |
| <i>Current May / RCP8.5 July</i>          | 9.31           | 75.2      | <0.01*       |
| <i>RCP8.5 May / Current July</i>          | 3.89           | 25.0      | 0.02*        |
| <i>RCP8.5 May / RCP8.5 July</i>           | 4.35           | 21.9      | 0.01*        |
| <i>Current November / Current July</i>    | 21.6           | 83.3      | <0.01*       |
| <i>Current November / RCP8.5 July</i>     | 24.4           | 121       | <0.01*       |
| <i>RCP8.5 November / Current July</i>     | 21.6           | 83.3      | <0.01*       |
| <i>RCP8.5 November / RCP8.5 July</i>      | 24.4           | 121       | <0.01*       |

Supplementary Table S2. Pairwise Wilcoxon post-hoc test on stickleback fresh lipids content between sexes and experimental scenarios at the final sampling of July, after 7 months of acclimation to RCP8.5 scenario. Stastistic: test statistic used to compute the p-value; p.adj: adjusted p-value using Tukey's method, df: degrees of freedom calculated using Welch's correction. Asterisks indicate statistical difference between scenarios.

| <i>Comparison</i>                       | <i>t-value</i> | <i>p.adj</i> |
|-----------------------------------------|----------------|--------------|
| <i>Current females / RCP8.5 females</i> | 57             | 0.03*        |
| <i>Current males / RCP8.5 males</i>     | 32             | 1            |
| <i>Current females / Current males</i>  | 27             | 1            |
| <i>RCP8.5 females / RCP8.5 males</i>    | 8              | 0.04*        |
| <i>Current males / RCP8.5 females</i>   | 60             | 0.01*        |
| <i>Current females / RCP8.5 males</i>   | 1              | 1            |

Supplementary Table S3. Stickleback feed conversion ratio (FCR), thermal growth coefficients (TGC), and mortality rate throughout the 7 months of experiment. Mortality was measured from the beginning of the RCP8.5 scenario stabilisation (12/12/2020).

|                           | <i>Scenario</i> | <i>FCR</i><br>( $mg_{food} \cdot mg_{body}^{-1}$ ) | <i>TGC</i><br>( $mg \cdot degree \ days^{-1}$ ) | <i>Mortality rate (%)</i> |
|---------------------------|-----------------|----------------------------------------------------|-------------------------------------------------|---------------------------|
| <i>November - January</i> | <i>Current</i>  | 12,25                                              | 0,41                                            | 7.69                      |
|                           | <i>RCP8.5</i>   | 14,48                                              | 0,30                                            | 11.49                     |
| <i>November - March</i>   | <i>Current</i>  | 16,25                                              | 0,39                                            | 18.20                     |
|                           | <i>RCP8.5</i>   | 16,10                                              | 0,37                                            | 22.03                     |
| <i>November - May</i>     | <i>Current</i>  | 23,42                                              | 0,31                                            | 20.64                     |
|                           | <i>RCP8.5</i>   | 23,49                                              | 0,31                                            | 23.91                     |
| <i>November - July</i>    | <i>Current</i>  | 19,88                                              | 0,31                                            | 24.01                     |
|                           | <i>RCP8.5</i>   | 23,97                                              | 0,27                                            | 31.83                     |

Supplementary Table S4. Table providing the statistical tests and scores of data analysis used throughout the paper. Asterisks indicate statistical difference between scenarios.

| <i>Analysed data</i>      | <i>Statistical test</i>         | <i>Statistical test value</i>                    | <i>Degree of freedom</i>                | <i>p-value</i>                                       |
|---------------------------|---------------------------------|--------------------------------------------------|-----------------------------------------|------------------------------------------------------|
| Mortality                 | Pearson chi-squared             | 6.36                                             | 1                                       | 0.01*                                                |
| Mass along the 7 months   | Welch                           | 138.96                                           | 11                                      | <0.01*                                               |
| Final standard length     | Kruskal-Wallis                  | 1.90                                             | 1                                       | 0.17                                                 |
| Final body mass           | ANOVA                           | 0.06                                             | 1                                       | 0.80                                                 |
| Standard length           |                                 | male: 0.12<br>female: 3.36                       | male: 1<br>female: 1                    | male: 0.74<br>female: 0.09                           |
| Body mass                 |                                 | male: 0.15<br>female: 0.94                       | male: 1<br>female: 1                    | male: 0.70<br>female: 0.35                           |
| Males $K_{corr}$ index    |                                 | 0                                                | 1                                       | 0.99                                                 |
| Females $K_{corr}$ index  | Kruskal-Wallis                  | 1.33                                             | 1                                       | 0.25                                                 |
| Male GSI                  |                                 | 0.07                                             | 1                                       | 0.80                                                 |
| Female GSI                | ANOVA                           | 0.87                                             | 1                                       | 0.37                                                 |
| Males HSI                 |                                 | 1.05                                             | 1                                       | 0.32                                                 |
| Females HSI               | Kruskal-Wallis                  | 0.08                                             | 1                                       | 0.77                                                 |
| KSI                       | ANOVA                           | male: 4.40<br>female: < 0.01                     | male: 1<br>female: 1                    | male: 0.06<br>female: 0.94                           |
| Muscle Lipids content     | Kruskal-Wallis                  | 11.35                                            | 3                                       | 0.01*                                                |
| gnrh2 expression          | Welch                           | 1.69                                             | 3                                       | 0.24                                                 |
| gnrh3 expression          |                                 | 2.85                                             | 3                                       | 0.11                                                 |
| kiss2 expression          |                                 | 0.86                                             | 3                                       | 0.49                                                 |
| gnih expression           |                                 | 1.03                                             | 3                                       | 0.42                                                 |
| cyp19a1b expression       | ANOVA                           | Scenario: 2.79<br>Sex: 10.62                     | Scenario:1<br>Sex: 1                    | Scenario: 0.11<br>Sex: <0.01*                        |
| Testis maturation         | Generalised linear mixed models | 0.55                                             | 1                                       | 0.46                                                 |
| Ovary maturation          |                                 | 8.91                                             | 1                                       | 0.01*                                                |
| 11-ketotestosterone       | Kruskal-Wallis                  | 1.14                                             | 1                                       | 0.28                                                 |
| 17- $\beta$ -estradiol    |                                 | 2.22                                             | 1                                       | 0.14                                                 |
| Number of eggs per female | ANOVA                           | 1.25                                             | 1                                       | 0.28                                                 |
| Fertilization rate        | Welch                           | 7.89                                             | 1                                       | 0.02*                                                |
| Eggs diameter             | ANOVA                           | Scenario:27.15<br>Dpf:16.67<br>Scenario/Dpf:0.16 | Scenario: 1<br>Dpf: 1<br>Scenario/Dpf:1 | Scenario:<0.01*<br>Dpf:<0.01*<br>Scenario/Dpf:0.68   |
| Eggs perivitelline index  |                                 | Scenario:7.72<br>Dpf:13.10<br>Scenario/Dpf:0.30  | Scenario:1<br>Dpf:1<br>Scenario/Dpf:1   | Scenario:<0.01*<br>Dpf: :<0.01*<br>Scenario/Dpf:0.58 |
| Sperm cells concentration |                                 | 0.01                                             | 1                                       | 0.92                                                 |
| Sperm cells mortality     |                                 | 0.83                                             | 1                                       | 0.38                                                 |
